# Supplementary material for: A preparation strategy for multicolor carbon dots embedded in silicone for latent fingermarks and detection of AcO−
Source: Royal Society of Chemistry journal article supplement (doi:10.1039/d3nj01688a), 2023-01-01
Supplement: d3nj01688a1.pdf [file d3nj01688a1.pdf]

## *Electronic Supplementary Information*

### **A preparation strategy of carbon dots with multicolor and embedded in silicone for latent fingerprints and detection of AcO<sup>-</sup>**

Tingzhong Li,<sup>a</sup> Qinglu Yu,<sup>b</sup> Zhuang Du,<sup>c</sup> Jie Gao,<sup>c</sup> Dong Lu,<sup>d</sup> Rui Liang,<sup>e</sup> and Guoxing Sun<sup>\*ab</sup>

<sup>a</sup> Zhuhai UM Science & Technology Research Institute, Zhuhai 519031, China.

<sup>b</sup> Joint Key Laboratory of the Ministry of Education, Institute of Applied Physics and Materials Engineering, University of Macau, Macau SAR, 999078, China.

<sup>c</sup> Guangzhou Lushan New Materials Co., Ltd., Guangzhou 510640, China.

<sup>d</sup> Guangzhou HKUST Fok Ying Tung Research Institute, Guangzhou 510640, China

<sup>e</sup> Department of Engineering Science, Faculty of Innovation Engineering, Macau University of Science and Technology, Macau SAR, 999078, China.

Corresponding author: gxsun@um.edu.mo

#### **Table of Contents**

- 1. Fig. S1** Photographs of CDs before and after being wrapped with organic silicon (heat them at 70 °C to curing). ① blank sample (pure KH560), ② contrast sample (KH560+urea+CA, without CDs), ③-⑤ sample of b-CDs, y-CDs and r-CDs.
- 2. Fig. S2** (A) photostability of s-y-CDs and y-CDs under UV lamp. (B) Photography of s-y-CDs soaked in ionic solution for 24 hours. Ionic solution concentration: 0.4M; excitation wavelength: 365 nm.
- 3. Fig. S3** The fluorescence stability of y-CDs in different temperature(A), pH(B). CDs solution concentration: 0.1mg/mL. excitation wavelength: 360 nm (y-CDs).
- 4. Fig. S4** The fluorescence of (A)b-CDs, (B)y-CDs and (C)r-CDs in different solution. CDs solution concentration: 0.1mg/mL. excitation wavelength: 351 nm (b-CDs), 360 nm (y-CDs), 500 nm (r-CDs).
- 5. Fig. S5** FTIR spectra of (A)KH560, b-CDs, s-b-CDs, os-b-CDs, (B)KH560, y-CDs, s-b-CDs, os-y-CDs, (C)KH560, r-CDs, s-r-CDs, os-r-CDs, (D) b-CDs, y-CDs, r-CDs.
- 6. Fig. S6** TEM (A-C) and particle size distributions (A'-C') of b-CDs, y-CDs and r-CDs.
- 7. Table S1** The Functional groups of CDs powders in XPS analysis.
- 8. Fig. S7** (A) Photographs and (B) gray value/distribution curve of os-b-CDs powder stained fingerprints on glass sheet, printing paper, corrugated paper, wood, steel, PE (and label) under UV light, respectively.
- 9. Fig. S8** (A) Photographs and (B) gray value/distribution curve of os-y-CDs powder stained fingerprints on glass sheet, printing paper, corrugated paper, wood, steel, PE (and label) under UV light, respectively.
- 10. Fig. S9** (A) Photographs and (B) gray value/distribution curve of os-r-CDs powder stained fingerprints on glass sheet, printing paper, corrugated paper, wood, steel, (PE) and label under UV light, respectively.

11. **Fig. S10** (A) Photographs and (B) gray value/distribution curve of stamp-pad ink stained fingerprints on glass sheet, printing paper, corrugated paper, wood, steel, PE (and label) under UV light, respectively.

12. **Fig. S11** Photograph of  $\gamma$ -CDs in water and addition of different ion (300  $\mu$ M) under daylight and UV lamp. CDs solution concentration: 0.1mg/mL; excitation wavelength: 365 nm.

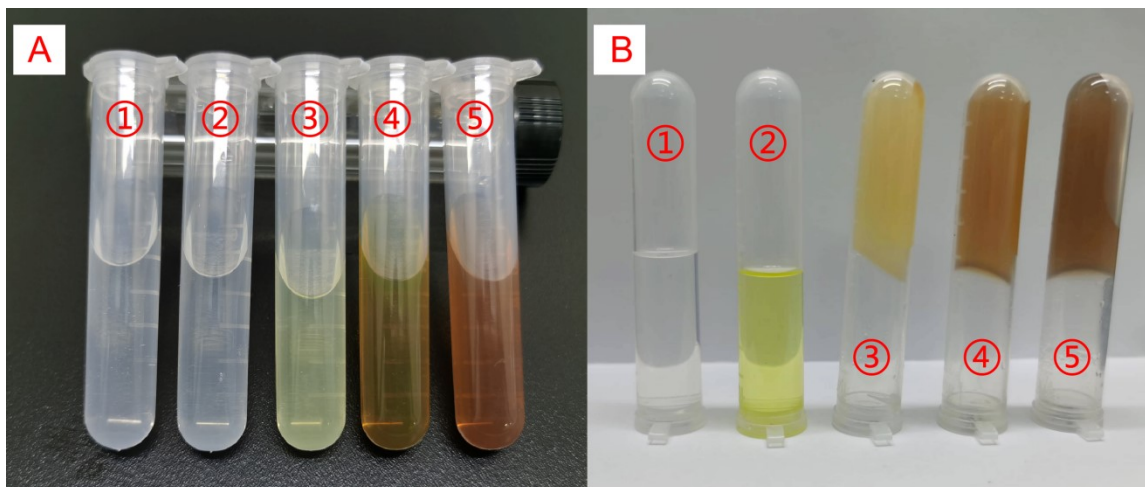

**Fig. S1** Photographs of CDs before and after being wrapped with organic silicon (heat them at 70 °C to curing). ①blank sample (pure KH560), ②contrast sample (KH560+urea+CA, without CDs), ③-⑤ sample of b-CDs,  $\gamma$ -CDs and r-CDs.

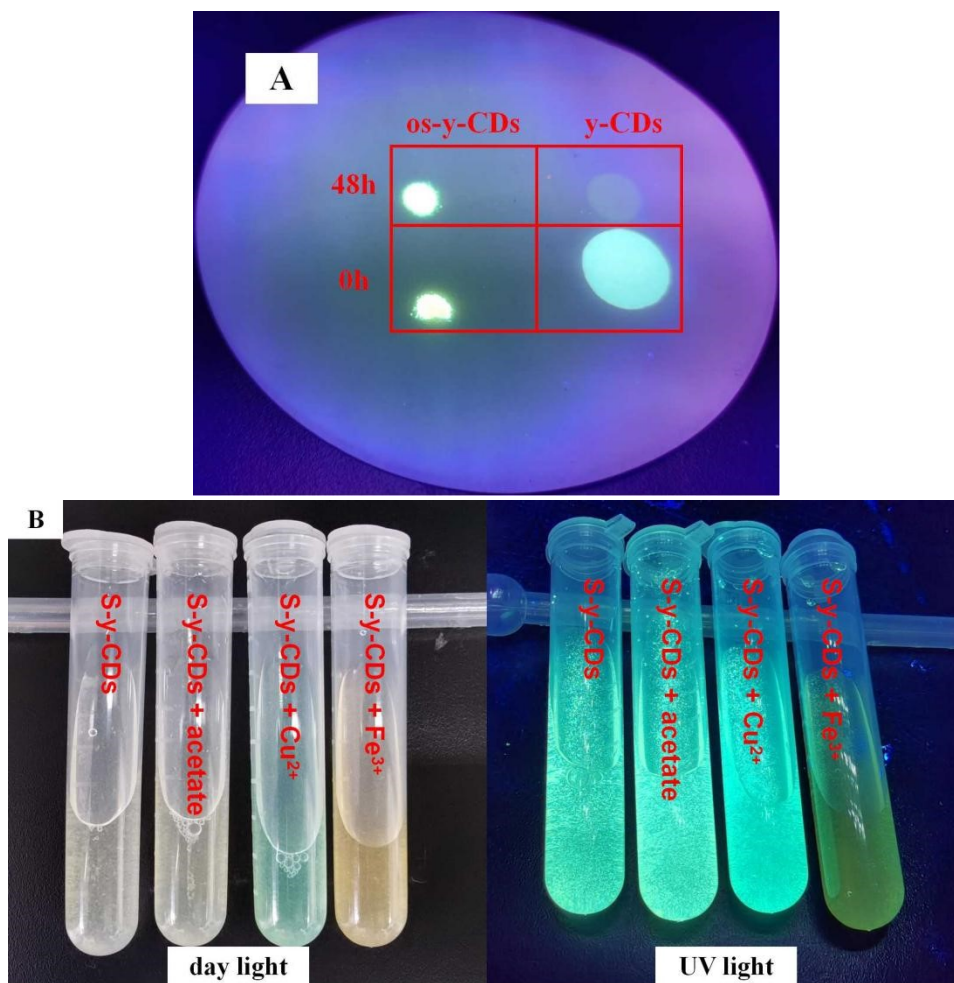

**Fig. S2** (A) photostability of s-y-CDs and y-CDs under UV lamp. (B) Photography of s-y-CDs soaked in ionic solution for 24 hours. Ionic solution concentration: 0.4M; excitation wavelength: 365 nm.

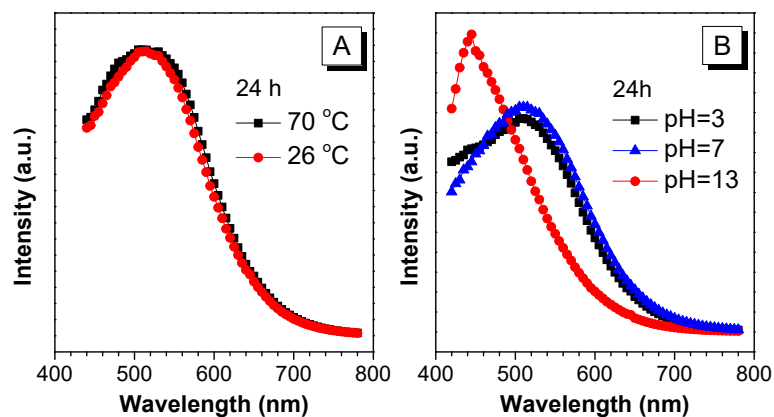

**Fig. S3** The fluorescence stability of  $\gamma$ -CDs in different temperature(A), pH(B). CDs solution concentration: 0.1mg/mL. excitation wavelength: 360 nm ( $\gamma$ -CDs).

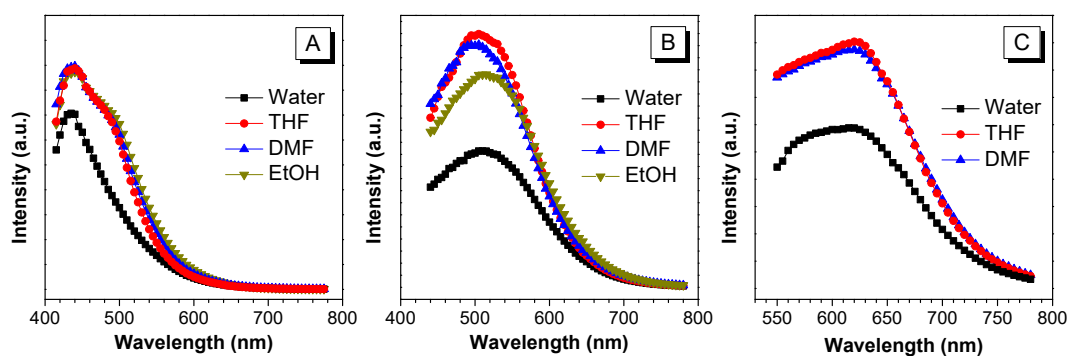

**Fig. S4** The fluorescence of (A)b-CDs, (B) $\gamma$ -CDs and (C)r-CDs in different solution. CDs solution concentration: 0.1mg/mL. excitation wavelength: 351 nm (b-CDs), 360 nm ( $\gamma$ -CDs), 500 nm (r-CDs).

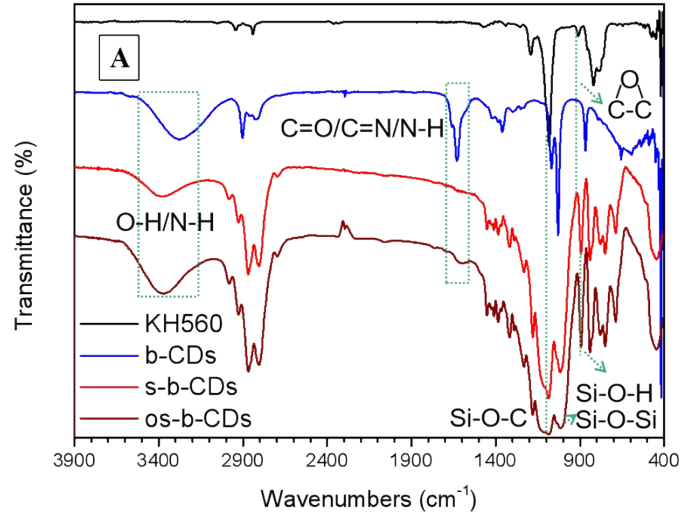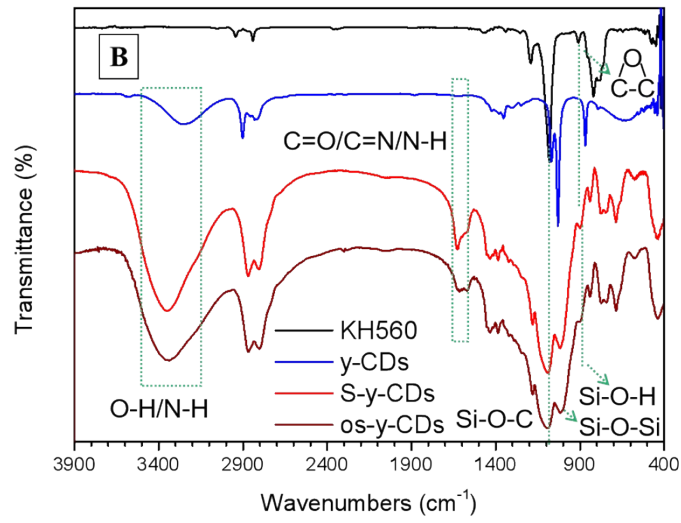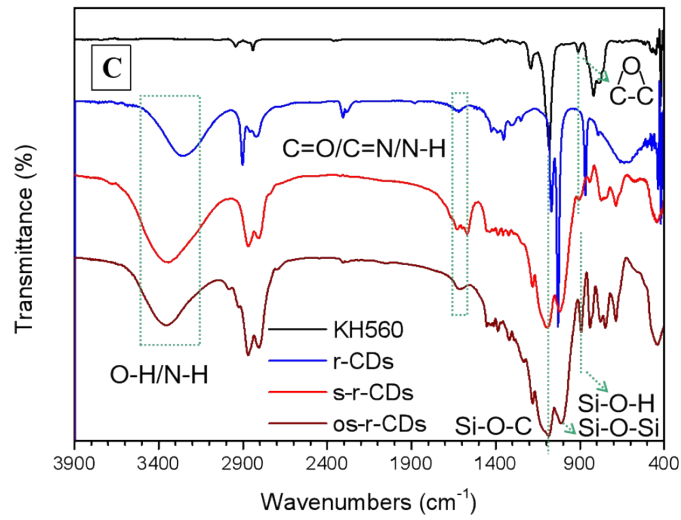

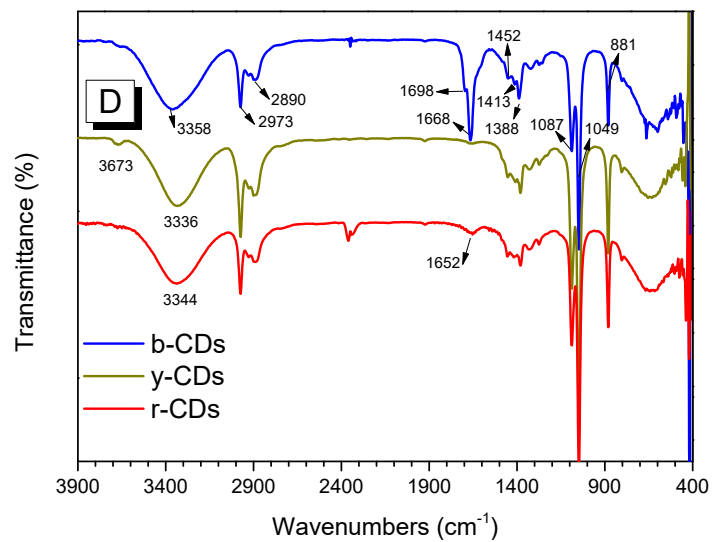

**Fig. S5** FTIR spectra of (A)KH560, b-CDs, s-b-CDs, os-b-CDs, (B)KH560, y-CDs, s-b-CDs, os-y-CDs, (C)KH560, r-CDs, s-r-CDs, os-r-CDs, (D)b-CDs, y-CDs, r-CDs

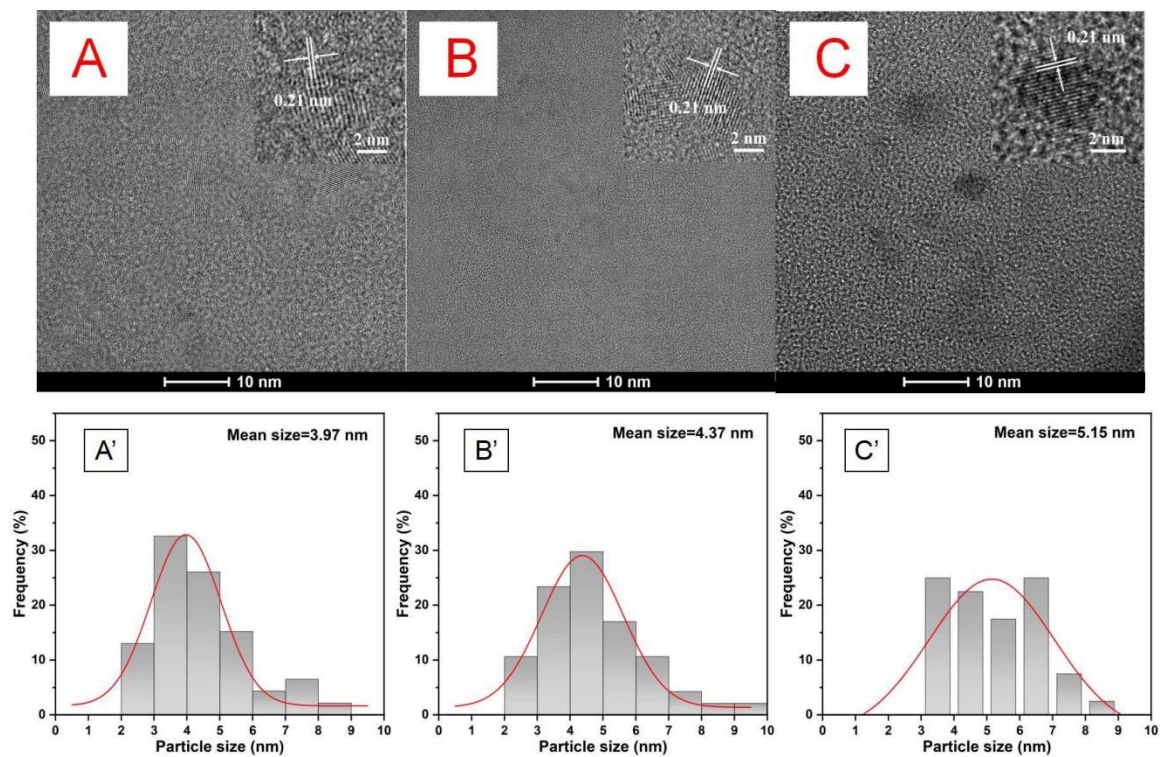

**Fig. S6** TEM (A-C) and particle size distributions (A'-C') of b-CDs, y-CDs and r-CDs.

**Table S1** The Functional groups of CDs powders in XPS analysis.

| Element | Functional group | b-CDs  | y-CDs  | r-CDs  |
|---------|------------------|--------|--------|--------|
| C1s     | C-C/C=C          | 32.68% | 23.68% | 34.66% |
|         | C-N              | 20.85% | 20.28% | 29.83% |
|         | C-O              | 7.97%  | 16.62% | 12.76% |
|         | C=O/C=N          | 4.50%  | 27.72% | 8.48%  |
|         | COOH             | 33.99% | 11.69% | 14.27% |
| N1s     | Pyridinic N      | 24.49% | 26.95% | 28.68% |
|         | Amino N          | 49.72% | 35.29% | 24.74% |
|         | Pyrrolic N       | 16.75% | 26.01% | 27.17% |
|         | GraphiticN       | 9.05%  | 11.75% | 19.40% |
| O1s     | C-O              | 67.73% | 55.12% | 54.46% |
|         | C=O              | 32.27% | 44.88% | 45.54% |

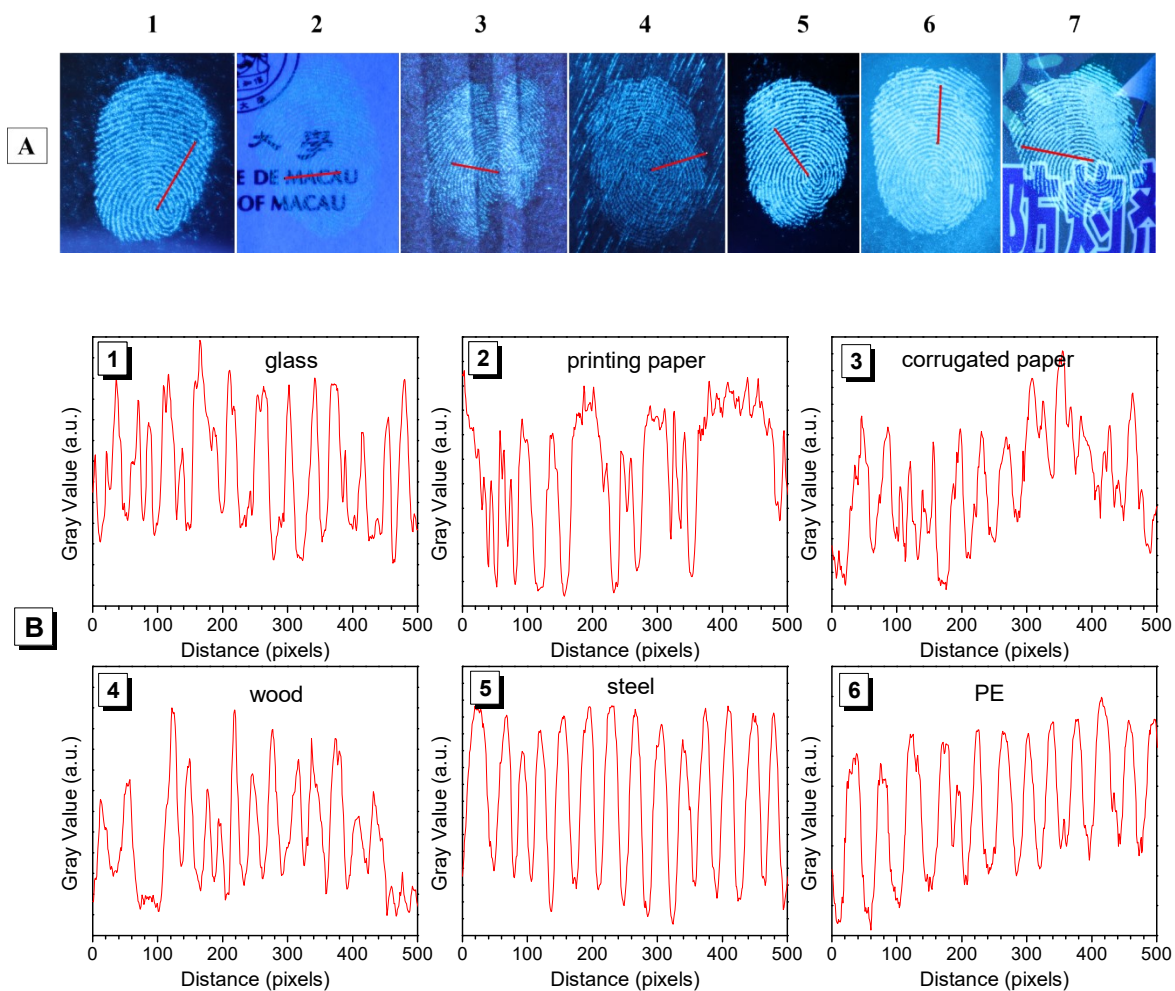

**Fig. S7** (A) Photographs and (B) gray value/distribution curve of os-b-CDs powder stained fingerprints on glass sheet, printing paper, corrugated paper, wood, steel, PE (and label) under UV light, respectively.



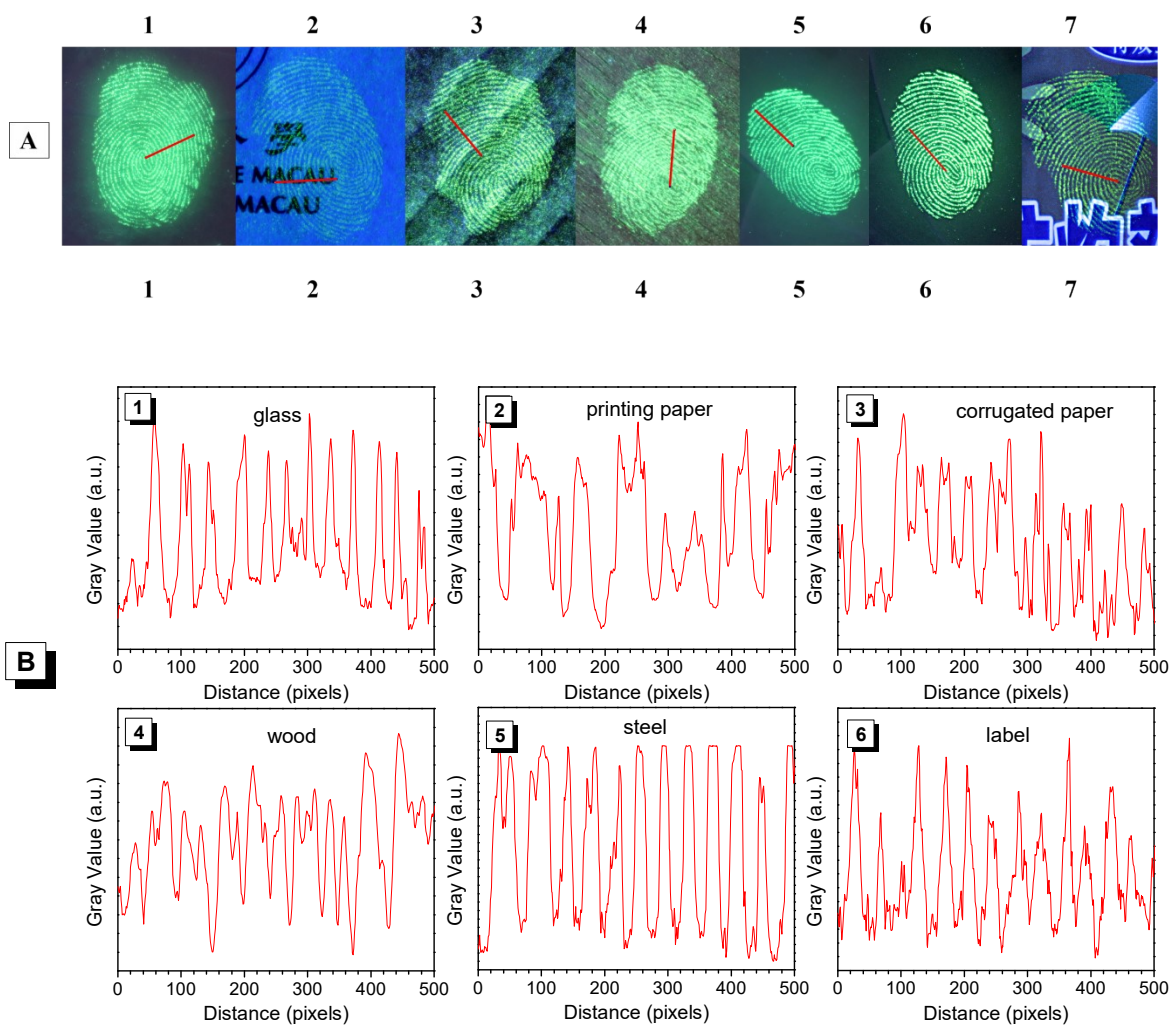

**Fig. S8** (A) Photographs and (B) gray value/distribution curve of os-y-CDs powder stained fingerprints on glass sheet, printing paper, corrugated paper, wood, steel, PE (and label) under UV light, respectively.

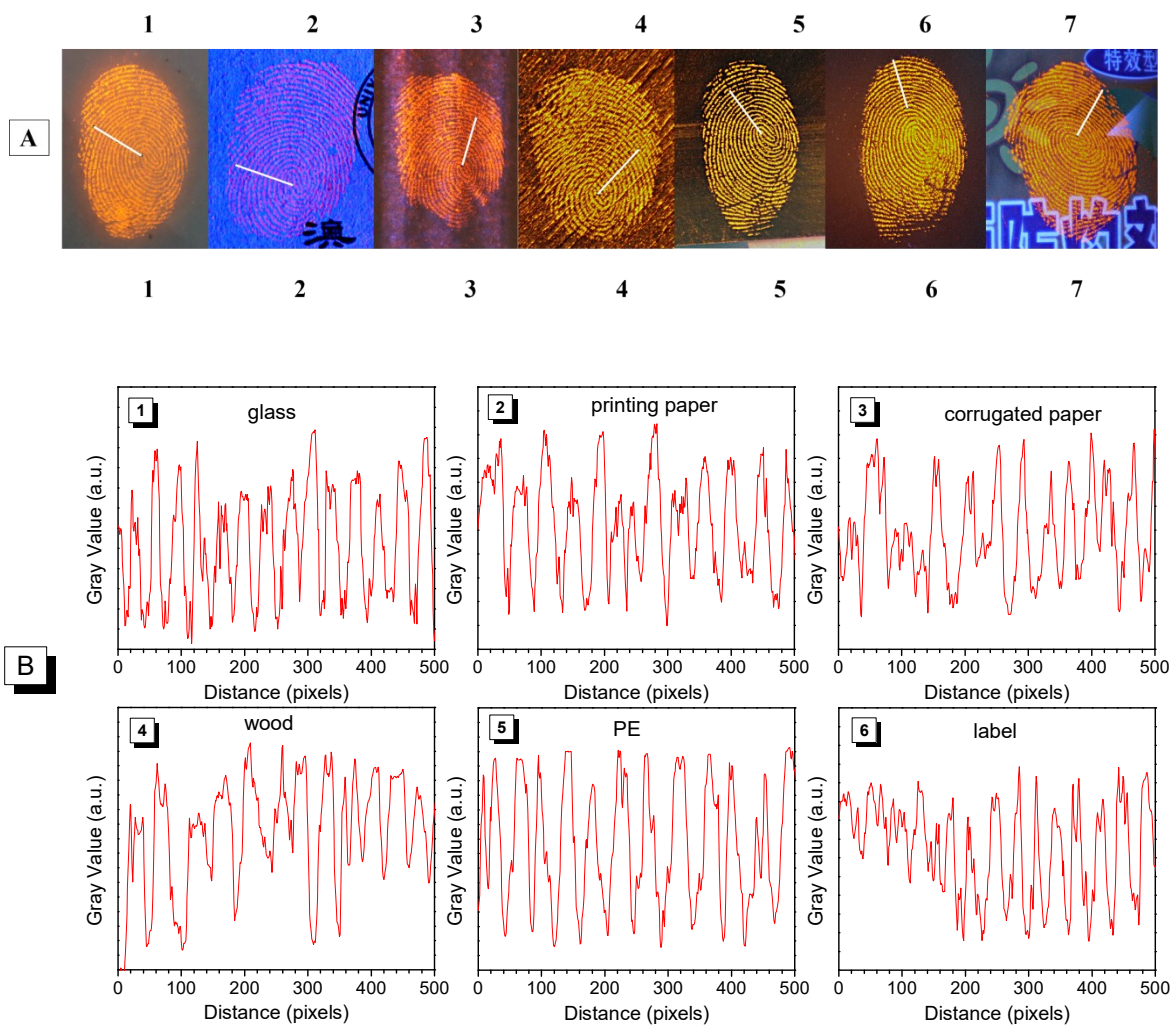

**Fig. S9** (A) Photographs and (B) gray value/distribution curve of os-r-CDs powder stained fingerprints on glass sheet, printing paper, corrugated paper, wood, steel, (PE) and label under UV light, respectively.

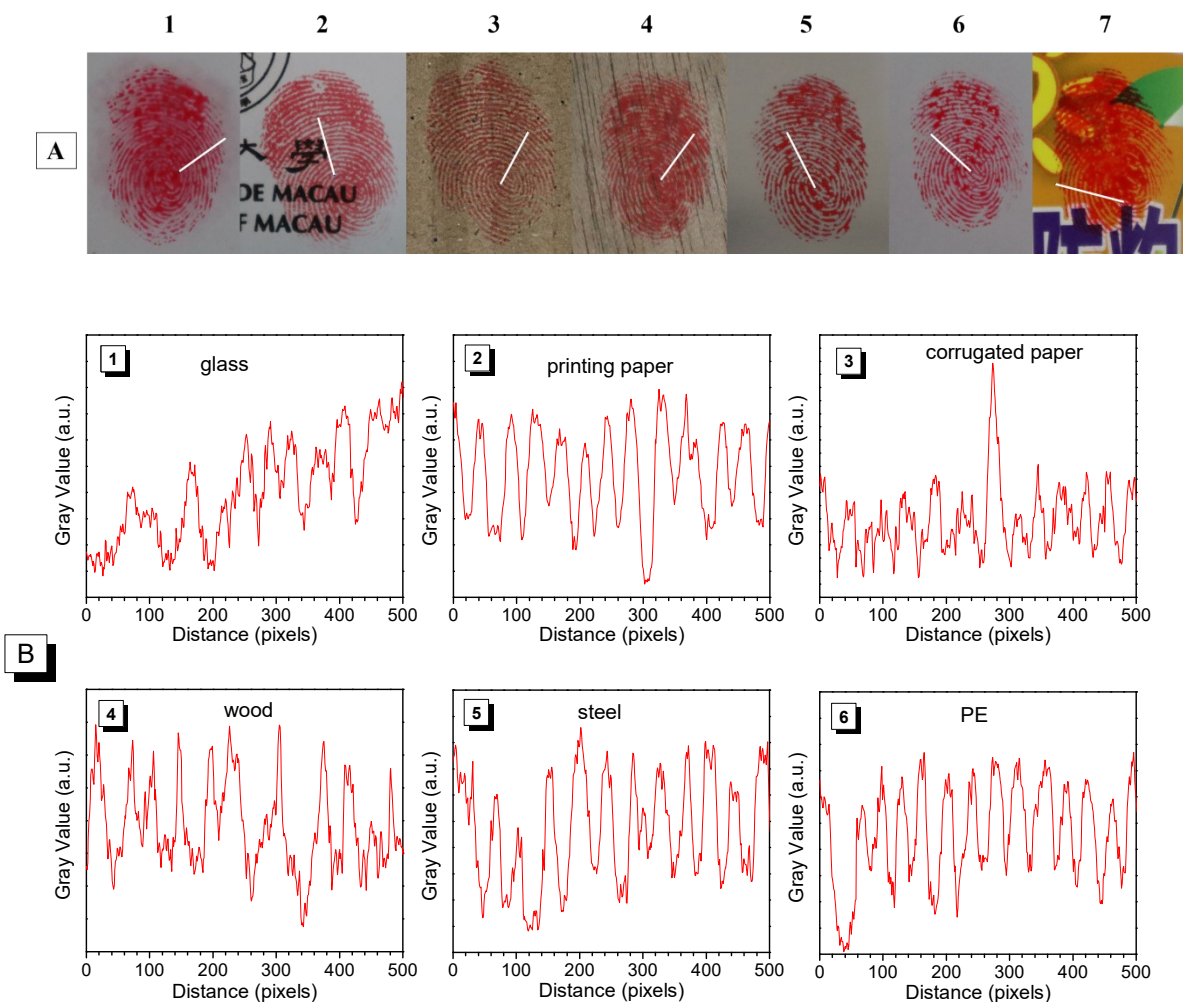

**Fig. S10** (A) Photographs and (B) gray value/distribution curve of stamp-pad ink stained fingerprints on glass sheet, printing paper, corrugated paper, wood, steel, PE (and label) under UV light, respectively.

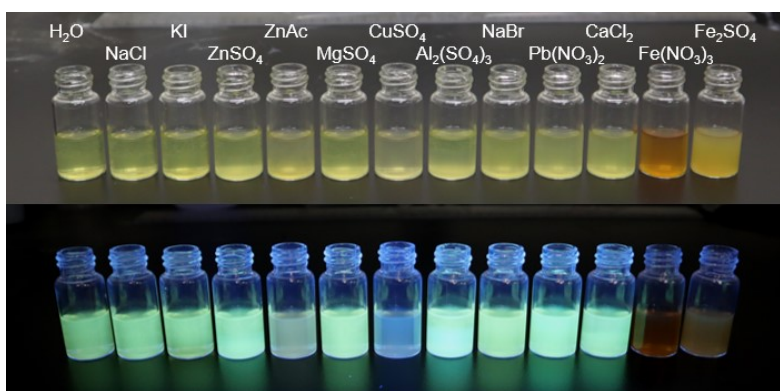

**Fig. S11** Photograph of y-CDs in water and addition of different ion (300  $\mu$ M) under daylight and UV lamp. CDs solution concentration: 0.1mg/mL; excitation wavelength: 365 nm.
